# Supplementary material for: WISP1 mediates IL-6-dependent proliferation in primary human lung fibroblasts
Source: PubMed Central journal article supplement (PMC4751539; doi:10.1038/srep20547), 2016-02-12
Supplement: srep20547-s1.pdf [file srep20547-s1.pdf]

WISP1 mediates IL-6-dependent proliferation in primary human lung fibroblasts

Klee S1, Lehmann M1, Wagner DE1, Baarsma HA1, Königshoff M1

1 – Comprehensive Pneumology Center, Helmholtz Zentrum München, Munich, Germany; Member of the German Center of Lung Research (DZL) and Ludwig-Maximilians-Universität, University Hospital Grosshadern

Corresponding author: [melanie.koenigshoff@helmholtz-muenchen.de](mailto:melanie.koenigshoff@helmholtz-muenchen.de)

Max-Lebsche Platz 31

81379 Munich

Germany

Tel: +49 89 3187 4668

Fax: +49 89 3187 4661

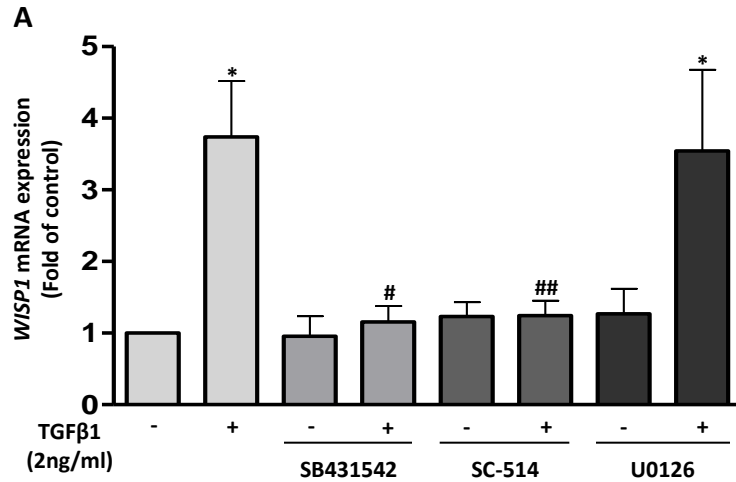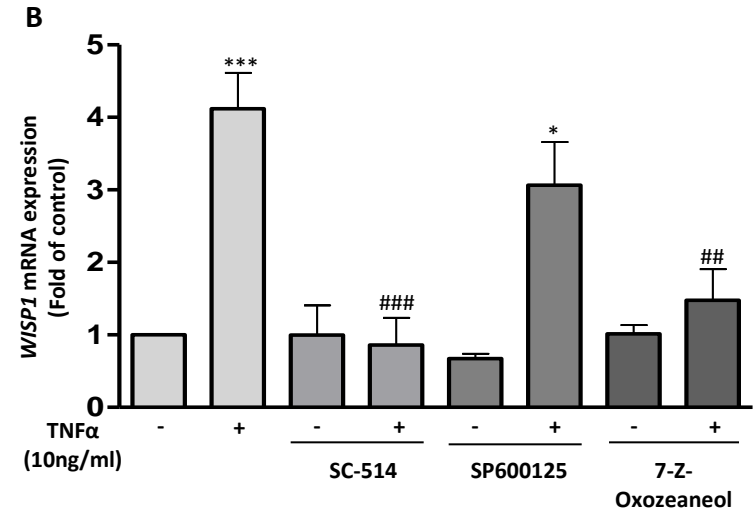

**Supplementary Figure 1: TGFβ1- and TNFα induce *WISP1* in pHLFs via NF-κB.** The pHLFs were treated for 24 hours with either (A) 2 ng/ml TGFβ1 in the absence or presence of the ALK5 inhibitor SB 431542 (10 μM), the IKKβ inhibitor SC-514 (10 μM) or the MEK1/2 inhibitor U126 (3 μM) or (B) with 10 ng/ml TNFα in the absence or presence of the IKKβ inhibitor SC-514 (10 μM), the JNK inhibitor SP 600125 (10 μM) or the TAK1 inhibitor 7-Z-Oxozeanol (500 nM). (n=3; \*,# p<0.05; student's t-test)

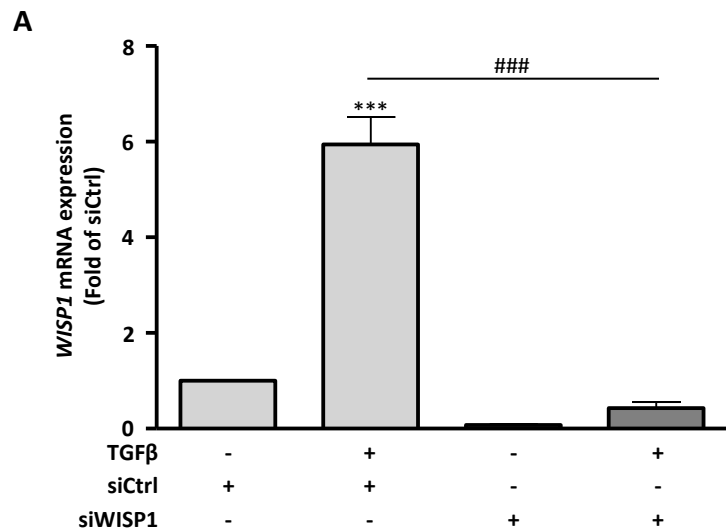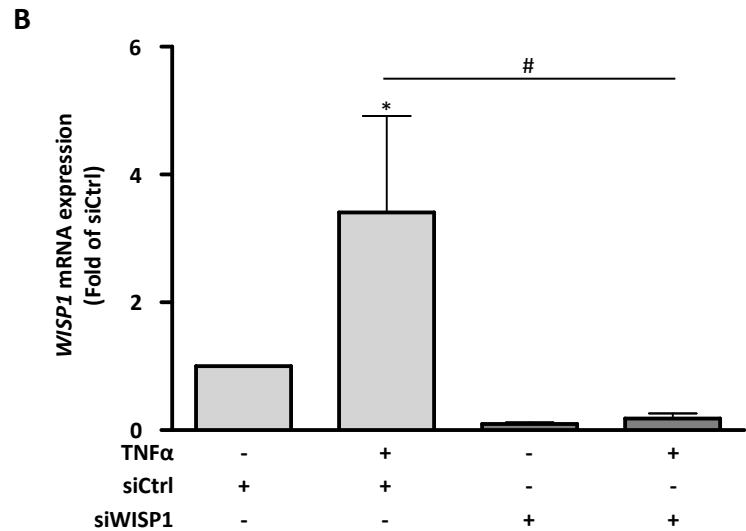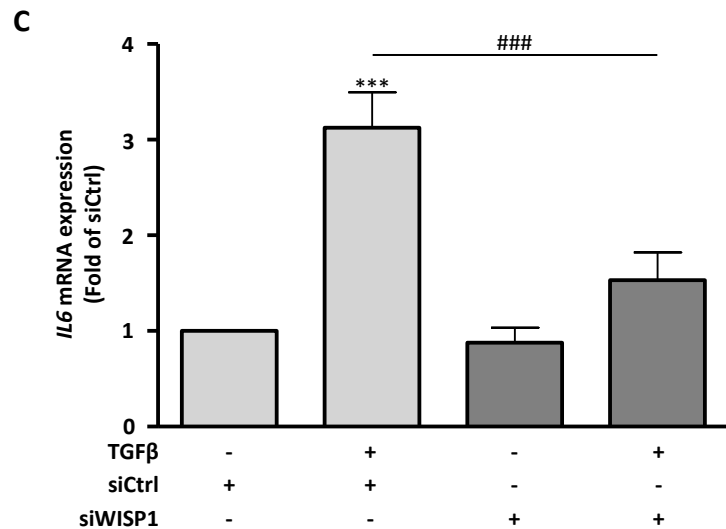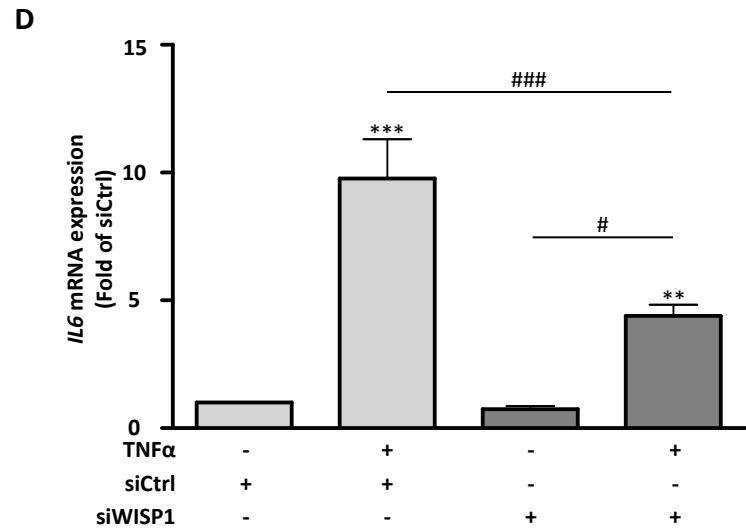

**Supplementary Figure 2: WISP1 is required for *IL6* induction in phLFs derived from IPF patients.** The phLFs were treated for 24 hours with either (A,C) 2 ng/ml TGFβ1 or (B,D) with 10 ng/ml TNFα in the absence or presence of the siRNA targeting WISP1 (siWISP1) or a non-targeting control siRNA (siCtrl). Effects on the expression of (A,C) *WISP1* and (B,D) *IL6* were analyzed using qPCR (n=3; \*,# p<0.05; \*\* p<0.01; \*\*\*, ### p<0.001; 1-way Anova with Newman-Keuls Multiple comparison testing).

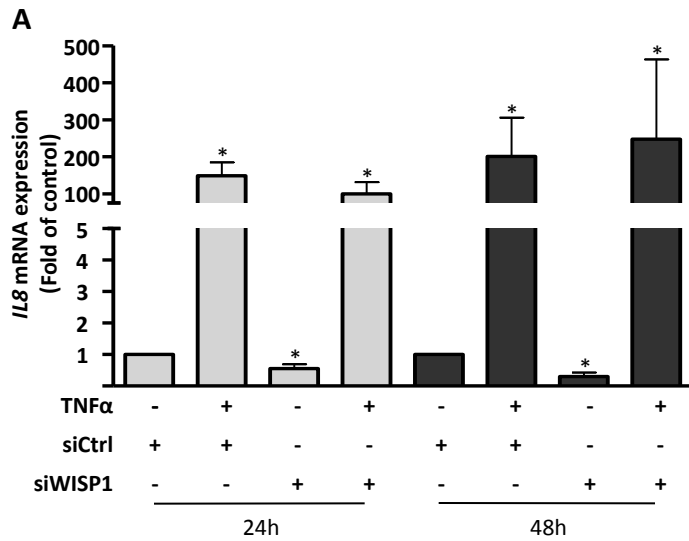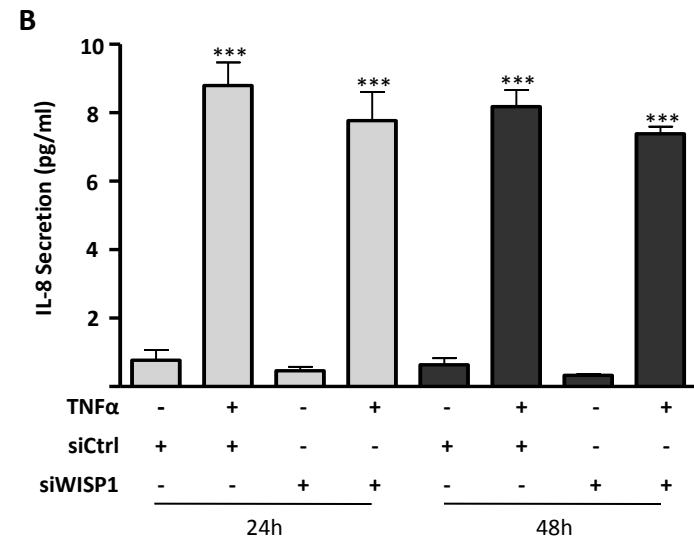

**Supplementary Figure 3: Production of IL-8 upon TNFα stimulation is not affected by the absence of WISP1 in pHLFs.** The pHLFs were treated for 24 and 48 hours with with 10 ng/ml TNFα in the absence or presence of the siRNA targeting WISP1 (siWISP1) or a non-targeting control siRNA (siCtrl). (A) The expression of *IL8* was measured by qPCR and (B) the secretion of IL-8 was analyzed using a multiplex ELISA (n=4; \* p<0.05; \*\*\* p<0.001; 1-way Anova with Newman-Keuls Multiple comparison testing).

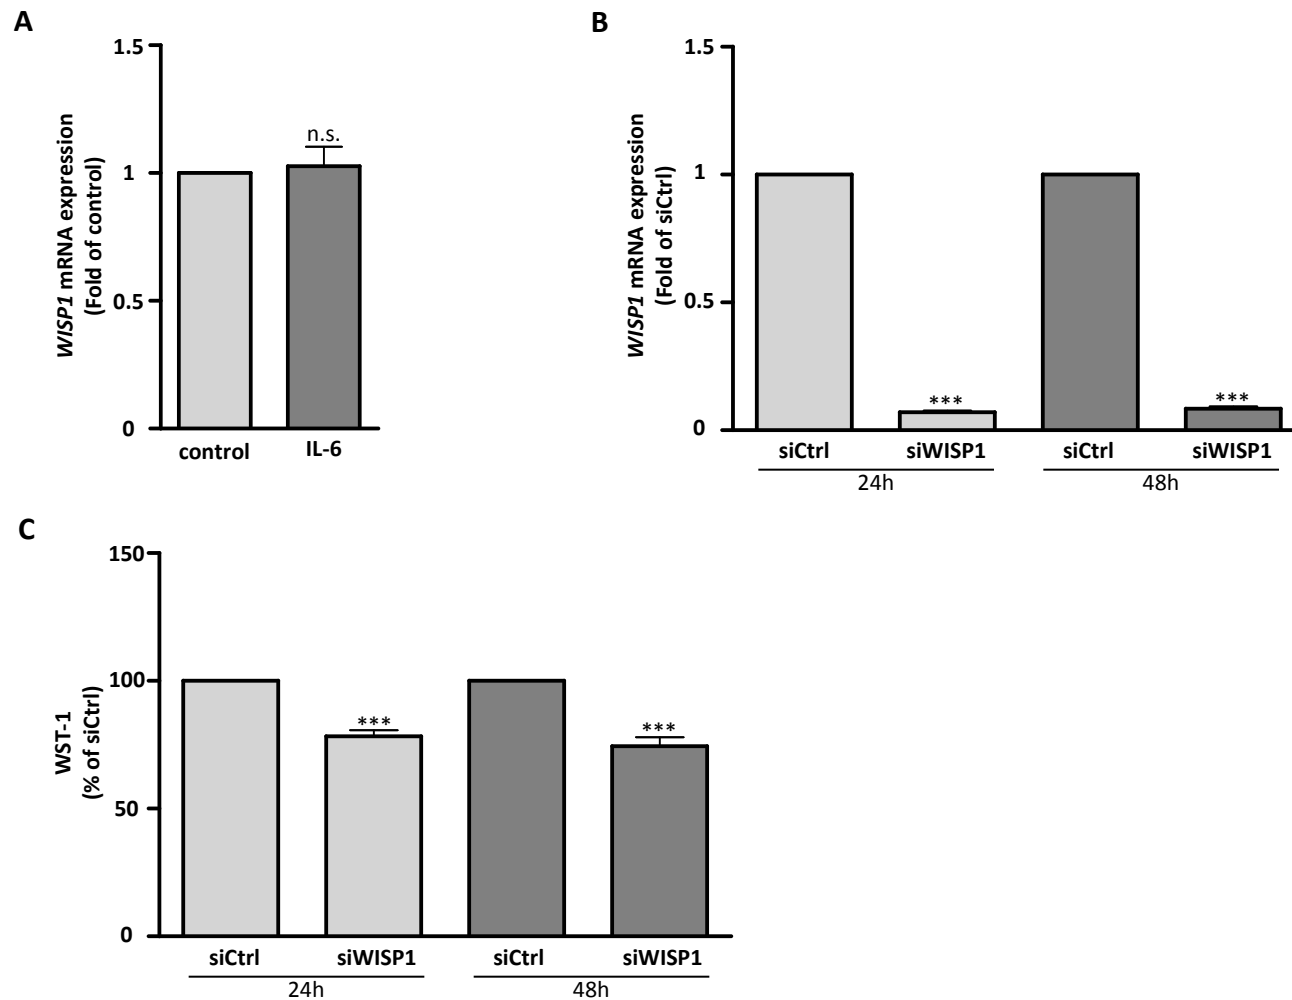

**Supplementary Figure 4: *WISP1* is not induced by IL-6 stimulation in pHLFs.** (A) The pHLFs were treated for 24 hours with 10 ng/ml IL-6 or (B,C) transfected with a *WISP1*-silencing siRNA (siWISP1) or a control siRNA (siRNA) and kept in 0.1% FCS-containing medium according to the stimulation protocol for 24 and 48h. (A,B) The expression of *WISP1* was measured by qPCR and (C) the metabolic activity of the pHLFs was measured by WST-1 assay (n=7; \*\*\* p<0.001; 1-way Anova with Newman-Keuls Multiple comparison testing).

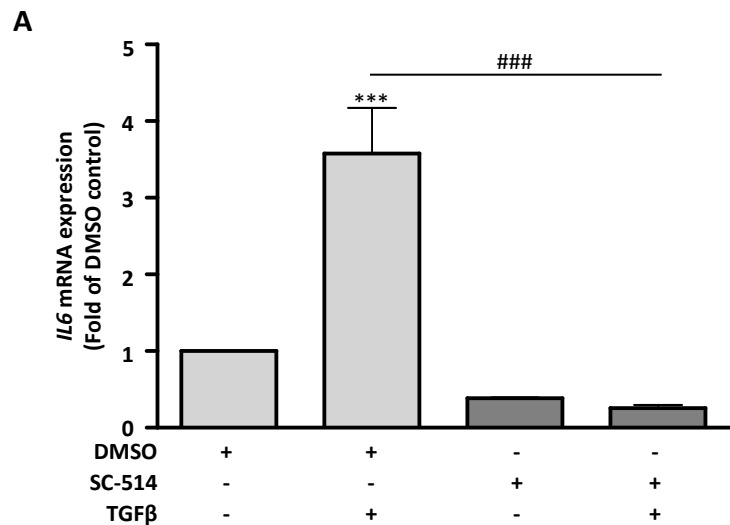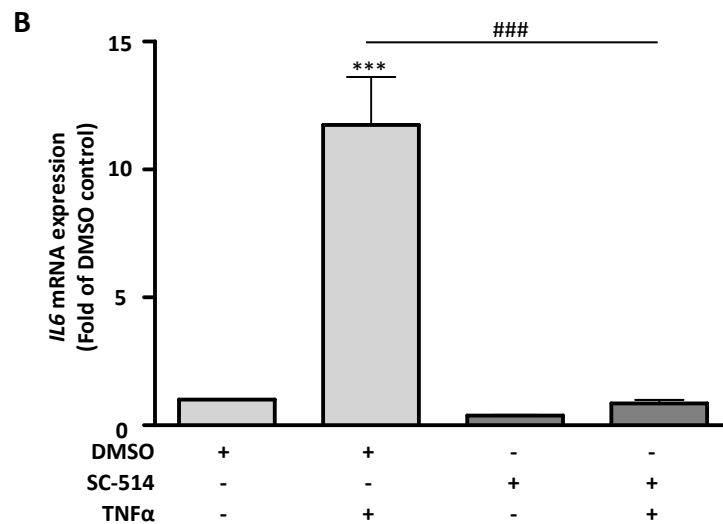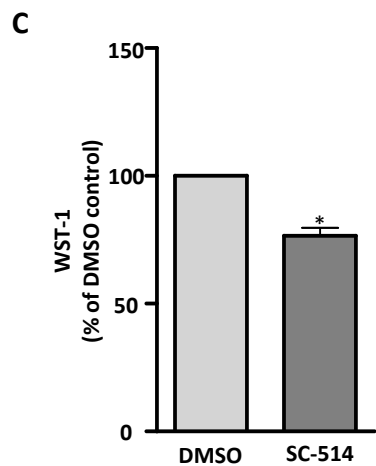

**Supplementary Figure 5: The IKKβ inhibitor SC-514 abrogates the expression of *IL6* and reduces proliferation in pHLF.** The pHLFs were treated for 24 hours with (A) 2 ng/ml TGFβ or (B) 10 ng/ml TNFα in the absence or presence of the IKKβ inhibitor SC-514 (50μM) and the expression of *IL6* was measured by qPCR. (C) Moreover, treatment of pHLFs with SC-514 (50μM) for 48 hours and proliferation was assessed by WST-1 assay (n=3; \*\*\*,### p<0.001, 1-way Anova with Newman-Keuls Multiple comparison testing for (A) and (B); \* p<0.05, students t-test for (C))

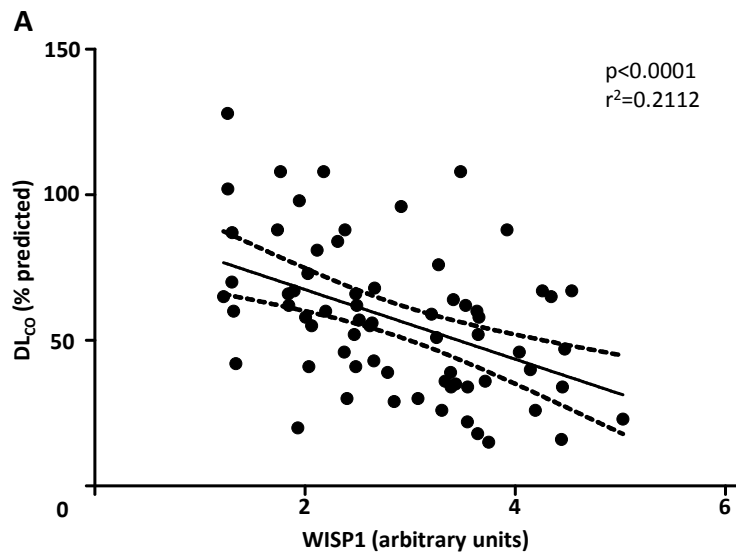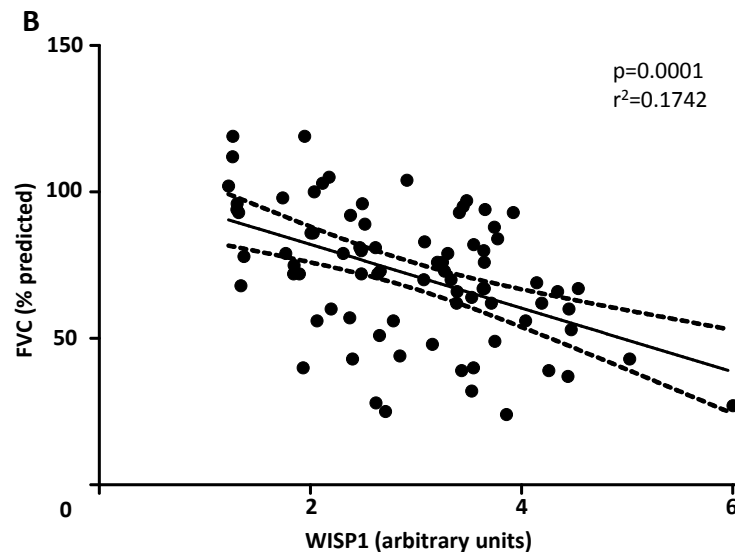

**Supplementary Figure 6: WISP1 mRNA levels negatively correlate with the diffusion capacity of the lung for carbon monoxide (DL<sub>CO</sub>) and the forced vital capacity (FVC) in human patients.** The correlation of WISP1 and (A) the predicted DL<sub>CO</sub> (N=68) or (B) the FVC (N=80) showed a significantly negative linear correlation. (dashed line = 95% CI; Data extracted from the LGRC GSE47460 GPL4680)

## TGFβ treatment

|        | siCtrl (pg/ml) | siWISP1 (pg/ml) | siCtrl + TGFβ (pg/ml) | siWISP1 + TGFβ (pg/ml) |
|--------|----------------|-----------------|-----------------------|------------------------|
| IL-6   | 0.76 ± 0.10    | 0.24 ± 0.05*    | 2.33 ± 0.10*          | 0.9 ± 0.17#            |
| IL-8   | 0.75 ± 0.42    | 0.39 ± 0.09     | 0.53 ± 0.25           | 0.33 ± 0.09            |
| MCP1   | 1.57 ± 0.44    | 0.83 ± 0.31     | 0.5 ± 0.14*           | 0.31 ± 0.08*           |
| IFNγ   | 0.07 ± 0.03    | 0.01 ± 0.01*    | 0.11 ± 0.02           | 0.02 ± 0.01*           |
| GM-CSF | n.d.           | n.d.            | n.d.                  | n.d.                   |
| IL-7   | 0.01 ± 0.00    | 0.01 ± 0.01     | 0.01 ± 0.00           | 0.01 ± 0.01            |
| TNFα   | 0.01 ± 0.00    | n.d.            | 0.01 ± 0.00           | n.d.                   |
| GCSF   | 0.01 ± 0.00    | n.d.            | 0.01 ± 0.00           | n.d.                   |
| IL-4   | 0.01 ± 0.00    | n.d.            | 0.01 ± 0.00           | n.d.                   |
| MIP1b  | n.d.           | n.d.            | n.d.                  | n.d.                   |
| IL-2   | n.d.           | n.d.            | n.d.                  | n.d.                   |
| IL-17  | n.d.           | n.d.            | n.d.                  | n.d.                   |
| IL-10  | n.d.           | n.d.            | n.d.                  | n.d.                   |
| IL-12  | n.d.           | n.d.            | n.d.                  | n.d.                   |
| IL-13  | n.d.           | n.d.            | n.d.                  | n.d.                   |
| IL-5   | n.d.           | n.d.            | n.d.                  | n.d.                   |
| IL-1b  | n.d.           | n.d.            | n.d.                  | n.d.                   |

**Supplementary Table 1:** The secretion of different cytokines by pHLFs was measured after TGFβ1 (2 ng/ml) stimulation *in vitro* for 24 hours using a multiplex ELISA kit (Bio-Plex Pro™ Human Cytokine 17-plex). (n=4; \*,# p<0.05; 1-way ANOVA followed by Neuman-Keuls multiple comparison test)



## TNF $\alpha$ treatment

|              | siCtrl (pg/ml)  | siWISP1 (pg/ml)  | siCtrl + TNF $\alpha$ (pg/ml) | siWISP1 + TNF $\alpha$ (pg/ml) |
|--------------|-----------------|------------------|-------------------------------|--------------------------------|
| IL-6         | 0.77 $\pm$ 0.16 | 0.26 $\pm$ 0.05* | 13.86 $\pm$ 3.97*             | 5.61 $\pm$ 0.92*,#             |
| IL-8         | 0.77 $\pm$ 0.52 | 0.47 $\pm$ 0.19  | 8.79 $\pm$ 1.17*              | 7.77 $\pm$ 1.45*               |
| MCP1         | 1.52 $\pm$ 0.41 | 0.90 $\pm$ 0.38  | 2.85 $\pm$ 0.60*              | 2.35 $\pm$ 0.23*               |
| IFN $\gamma$ | 0.08 $\pm$ 0.03 | 0.03 $\pm$ 0.02* | 0.39 $\pm$ 0.02*              | 0.28 $\pm$ 0.02*,#             |
| GM-CSF       | n.d.            | n.d.             | 0.24 $\pm$ 0.08*              | 0.06 $\pm$ 0.07#               |
| IL-7         | 0.01 $\pm$ 0.00 | n.d.             | 0.01 $\pm$ 0.01               | 0.01 $\pm$ 0.00                |
| TNF $\alpha$ | 0.01 $\pm$ 0.00 | n.d.             | 0.04 $\pm$ 0.00               | 0.03 $\pm$ 0.00                |
| GCSF         | 0.01 $\pm$ 0.00 | 0.05 $\pm$ 0.01  | n.d.                          | 0.05 $\pm$ 0.01                |
| IL-4         | 0.01 $\pm$ 0.00 | n.d.             | 0.02 $\pm$ 0.01               | 0.02 $\pm$ 0.00                |
| MIP1b        | n.d.            | n.d.             | 0.05 $\pm$ 0.01               | 0.04 $\pm$ 0.01                |
| IL-2         | n.d.            | n.d.             | 0.04 $\pm$ 0.00               | 0.02 $\pm$ 0.00                |
| IL-17        | n.d.            | n.d.             | 0.05 $\pm$ 0.01               | 0.03 $\pm$ 0.02                |
| IL-10        | n.d.            | n.d.             | n.d.                          | n.d.                           |
| IL-12        | n.d.            | n.d.             | n.d.                          | n.d.                           |
| IL-13        | n.d.            | n.d.             | n.d.                          | n.d.                           |
| IL-5         | n.d.            | n.d.             | n.d.                          | n.d.                           |
| IL-1b        | n.d.            | n.d.             | n.d.                          | n.d.                           |

**Supplementary Table 2:** The pLFs were treated with 10ng/ml TNF $\alpha$  for 24 hours in vitro and different cytokines were measured using a multiplex ELISA kit (Bio-Plex Pro™ Human Cytokine 17-plex) (n=4; \*,# p<0.05; 1-way ANOVA followed by Neuman-Keuls multiple comparison test)
